# Supplementary material
Source: PubMed Central journal article supplement (PMC2936641)
Supplement: 1006172107_pnas.1006172107_SI.pdf [file 1006172107_pnas.1006172107_SI.pdf]

# Supporting Information

Schnall-Levin et al. 10.1073/pnas.1006172107

## SI Text

**Cell Transfections.** S2R<sup>+</sup> cells were maintained in Schneider's medium (Invitrogen), supplemented with 10% FBS and 1% pen-strep. Cells were transfected in 12-well plates using the Effectene Transfection Kit (Qiagen) according to the manufacturer's instructions. For each ORF, cells were cotransfected with three plasmids: (i) ORF-WT fused to a Myc tag (or FLAG tag in tag-swap), (ii) ORF-MUT fused to a FLAG tag (or Myc tag in tag-swap), and (iii) either mCherry (Control) or mCherry-microRNA, all under the Actin promoter. Cells were cultured for three days, lysed, and analyzed by Western blot using LI-COR reagents. Imaging and quantification were performed using the LI-COR Aeries Infrared Imaging System.

**Microarrays.** S2R<sup>+</sup> cells were transfected with either mCherry (Control) or mCherry-miR-1, both under the Actin promoter, as described above. Cells were cultured for two days before harvest and total RNA was extracted using TriZol reagent (Invitrogen) and further purified using Qiagen RNeasy column. Recovered RNA was quantified using a Nanodrop ND-1000 spectrophotometer (Nanodrop Technology). RNA integrity was assessed using an Agilent 2100 bioanalyzer. Samples were labeled following Agilent's two-color microarray-based gene expression analysis (Quick Amp labeling) protocol. Gene expression profiles were generated using a customized Agilent 8 × 15k whole *Drosophila* Genome Microarray, processed in duplicate, and expression levels were extracted using Agilent Feature Extraction software. Log ratios were averaged over multiple probes and over technical replicates. Only probes with signal above the median were included in the analysis.

**Mutagenesis.** Mutagenesis was carried out with the QuikChange II Site-Directed Mutagenesis Kit (Stratagene). All miRNA seed sites were disrupted with two synonymous point mutations.

Below we show the microRNA seed sites in their context and the mutagenesis primers used. Seed matches are shown in bold and amino acid sequences are shown below the nucleotide sequences. Mutated positions are highlighted in red. All nucleotide sequences displayed begin in-frame.

### 1. Jaguar (FBgn0011225). (i) K Box 8-mer site:

WT: TCCTGTGATATT  
AA: Ser Cys Asp Ile  
Mut: TCCTGCGACATT

Forward primer: GATGCTATCAACACGTCCTGCGACAT-TGAGCTGCTGGAGGCCTG

Reverse primer: CAGGCCTCCAGCAGCTCAATGTGCGA-GGACGTGTTGATAGCATC

### 2. CG11178 (FBgn0030499). (i) Mir-1 8-mer site:

WT: ACATTCCAG  
AA: Thr Phe Gln  
Mut: ACTTTTCAG

Forward primer: CAGCCCAAGAGATCTCAGTTACTTTT-CAGAATCATAAGGACGTCGAAG

Reverse primer: CTTCGACGTCCTTATGATTCTGAAAA-GTAACTGAGATCTCTGGGCTG

### 3. CG8494 (FBgn0033916). (i) Mir-1 8-mer site:

WT: ACATTCCAG

AA: Thr Phe Gln  
Mut: ACTTTTCAG

Forward primer: GTCCACACGCGAGGAACTTTTCAG-GATCTCTCGCTGCCC

Reverse primer: GGGCAGCGAGAGATCCTGAAAAGTT-TCCTCGCGTGTGGAC

(ii) Mir-1 7-mer site #1:

WT: CATTCCAAG  
AA: His Ser Lys  
Mut: CACTCGAAG

Forward primer: CCATGGTGGGATTTTGCCTCGAAG-GCGGACGTAATCAGC

Reverse primer: CTGATTACGTCGCCCTTCGAGTGCAA-AATCCCACCATGGG

(iii) Mir-1 7-mer site #2:

WT: CCATTCCAA  
AA: Pro Phe Gln  
Mut: CCCTTTCAA

Forward primer: AGCTTACCCATTTTCGATACCCTTTCAA-AGCGACAATTTCCAGGTG

Reverse primer: ACCTGGAAATTGTCGCTTTGAAAGGG-TATCGAAATGGGTAAGCTG

### 4. Smaug (FBgn0016070). (i) K Box 8-mer site:

WT: CTCTGTGATAAT  
AA: Leu Cys Asp Asn  
Mut: CTCTGCGACAAT

Forward primer: GGTCGATCAATCCACTCTGCGACAA-TCTTAATGGTATTACCC

Reverse primer: GGTAATACCATTAAGATTGTCGCAGAGTGATTGATCGACCC

### 5. Arp87C (FBgn0011745). (i) Mir-1 8-mer site:

WT: CACATTCCA  
AA: His Ile Pro  
Mut: CATATCCCA

Forward primer: CCGGCTTTGCTGGTGAGCATATCCCA-AAATGCAGGTTTCCC

Reverse primer: GGGAAACCTGCATTTTGGGATATGCT-CACCAGCAAAGCCGG

(ii) Mir-8 8-mer site:

WT: CACAGTATTATG  
AA: His Ser Ile Met  
Mut: CACAGCATCATG

Forward primer: GATTTCGCATGCCTCACAGCATCA-TGCGCGTGGACATCGCC

Reverse primer: GGCGATGTCCACGCGCATGATGCT-GTGAGGCATGGCGAATC

### 6. Act88F (FBgn0000047). (i) Mir-8 8-mer site:

WT: CCAGTATTA  
AA: Pro Val Leu  
Mut: CCCGTTTTA

Forward primer: GTGGCCCCGAGGAGCATCCCGTTT-  
TATTGACCGAGGCTCCACTG

Reverse primer: CAGTGGAGCCTCGGTCAATAAAACG-  
GGATGCTCCTCGGGGGCCAC

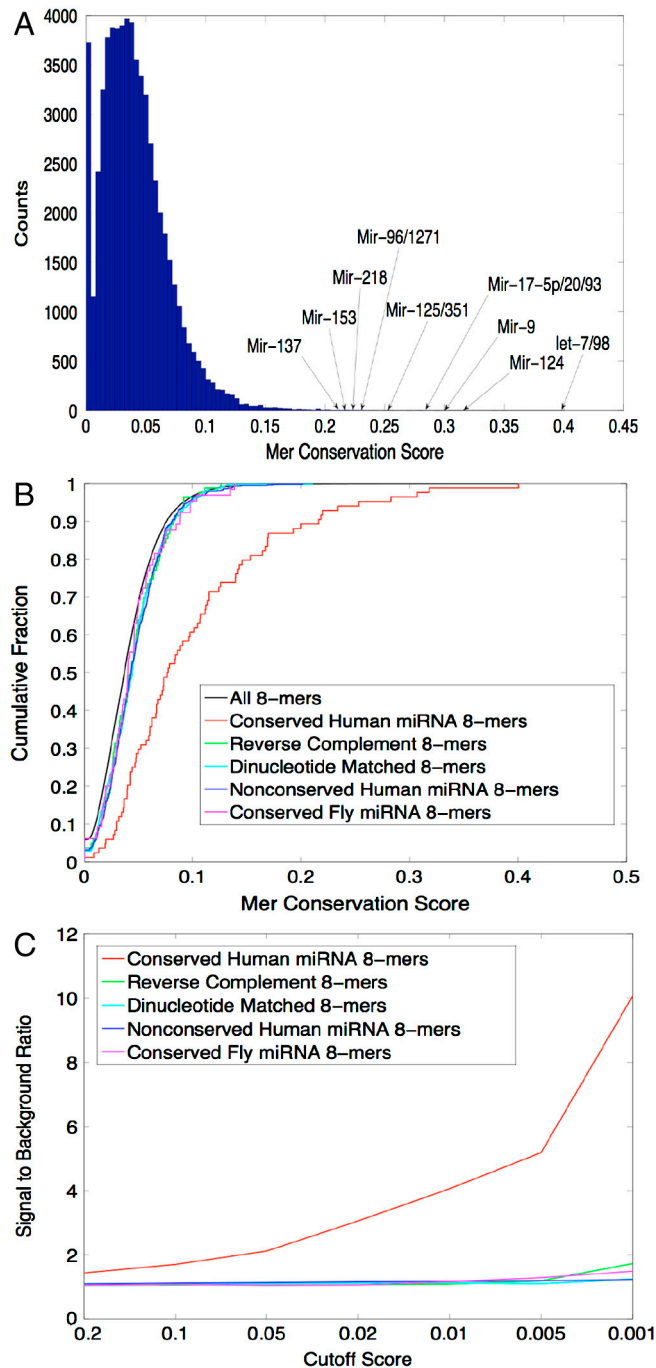

**Fig. S1.** MicroRNA seed sites are among the most highly conserved motifs in coding regions in humans. (A) Histogram of conservation scores for all 65,536 8-mers. A majority of the top conserved 8-mers correspond to miRNA seed sites. (B) Cumulative plot of scores for different sets of 8-mers. Shown are all 8-mers (black), conserved human miRNA seeds (red), reverse complements of these seeds (green), 8-mers with identical dinucleotide content to these seeds (cyan), nonconserved human miRNA seeds (blue), and conserved *Drosophila* miRNA seeds (magenta). (C) Imposing increasingly stringent conservation cutoff results in higher signal-to-noise ratios for the set of human conserved miRNA seeds, whereas control sets behave as background at all cutoffs.

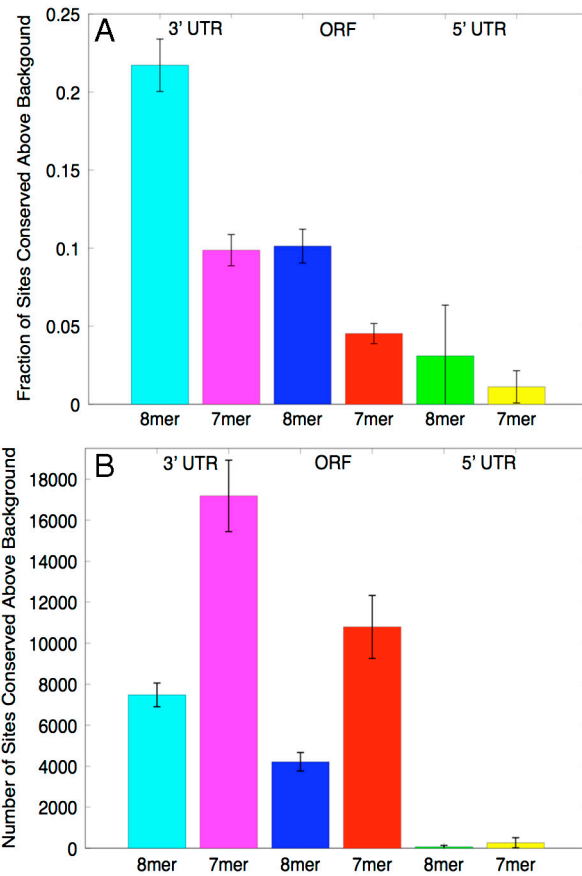

**Fig. S2.** The scale of conserved miRNA targeting in 3'UTRs, ORFs, and 5'UTRs in humans. (A) Fraction of sites conserved above background for both 8-mers and 7-mers in 3'UTRs, ORFs, and 5'UTRs. (B) Number of predicted sites above background for 8-mers and 7-mers in 3'UTRs, ORFs, and 5'UTRs. Error bars show standard deviation in the estimates obtained from sampling of background sets (see *Methods*).

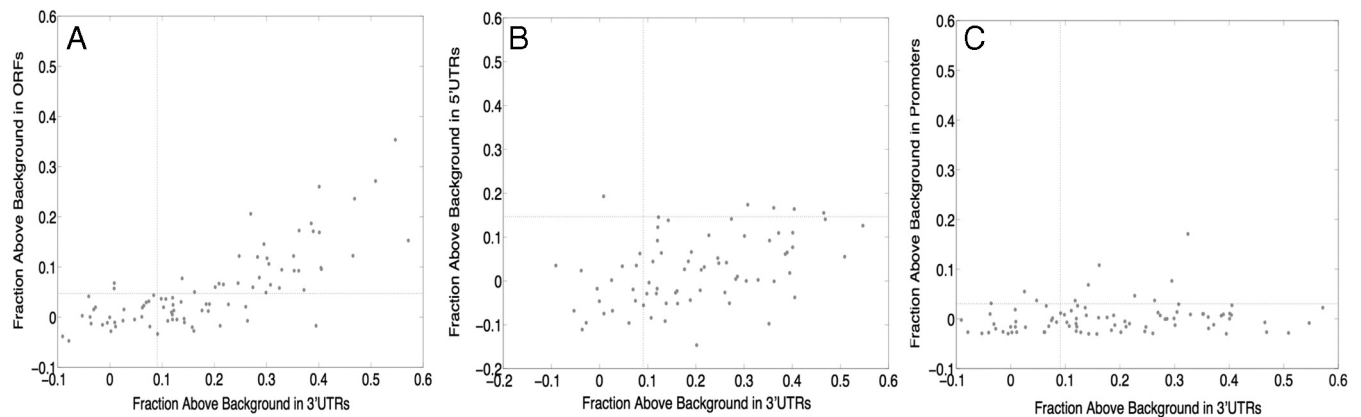

**Fig. S3.** MicroRNA seeds showing the highest level of conservation in human 3' UTRs tend also to be the most conserved in ORFs and to a very small extent in 5' UTRs, but not in promoter regions. Shown are the fractions of sites conserved above background at 60% confidence cutoff (for 5'UTRs and promoters the cutoff was chosen to be the same as for 3'UTRs) between (A) 3'UTRs and ORFs, (B) 3'UTRs and 5'UTRs, and (C) 3'UTRs and promoters. Dotted vertical and horizontal lines show the cutoff for conservation above background equal to the maximal amount by which any miRNA was conserved below background.

**Table S1. The most conserved 8-mer motifs in *Drosophila* coding regions**

| Highest scoring motifs                                                           | Annotation                 |
|----------------------------------------------------------------------------------|----------------------------|
| AAGACTGA<br>AGACTGAA                                                             | mir-14                     |
| CTGTGATA<br>TGTGATAC<br>ACTGTGAT<br>TCTGTGAT<br>TGTGATAT<br>TGTGATAA<br>TTGTGATA | K-box (mir-2a/6/11/13/308) |
| ACATTCCA<br>CATTCCAA<br>AACATTCC                                                 | mir-1                      |
| ATGAACAA<br>ATGGACAA<br>ATGTACAA                                                 | Unknown                    |
| TCTAGTCA<br>CTCTAGTC<br>TCTAGTCT                                                 | mir-279/286/996            |
| ACATATCA                                                                         | mir-190                    |
| ACCAAAGA                                                                         | mir-9                      |
| TGCATTTA<br>GCATTTAG                                                             | mir-277                    |
| GTCAATTA                                                                         | Unknown                    |
| CAGTATTA<br>AGTATTAA<br>AAGTATTA                                                 | mir-8                      |

The top 26 most conserved 8-mers form 10 motifs, 8 of which correspond to miRNA seeds.

**Table S2. The most conserved 8-mer motifs in human coding regions**

| Highest scoring motifs                                                                                               | Annotation      |
|----------------------------------------------------------------------------------------------------------------------|-----------------|
| CTACCTCA<br>TTACCTCA<br>CTACCTCC<br>ACTACCTC<br>CCTACCTC<br>GCTACCTC<br>TCTACCTC<br>CTACCTCG<br>TACCTCAG<br>TACCTCAT | let-7/98        |
| ATGGCGGC<br>ATGGCGGA<br>TGGCGGCG<br>GGCGGCGG<br>GGCGGCGC<br>AGGCGGCG<br>CGGCGGCG                                     | Unknown         |
| GTGCCTTA<br>ATGCCTTA<br>GTGCCTTG<br>AGTGCCTT<br>AAGTGCCT<br>TGCCTTAA                                                 | mir-124         |
| ACCAAAGA<br>AACCAAAG<br>TACCAAAG                                                                                     | mir-9           |
| GCACTTTA                                                                                                             | mir-17-5p/20/93 |
| CGCCGCCG<br>CCGCCGCC<br>GCCGCCGC<br>GCGCCGCT<br>GCCGTCGG                                                             | Unknown         |
| TTAGCTCG                                                                                                             | Unknown         |
| CTCAGGGA                                                                                                             | mir-125/351     |
| GCGCGCTT                                                                                                             | Unknown         |
| TTTGATGA                                                                                                             | Unknown         |
| CGCACGCG<br>CGCACTCG                                                                                                 | Unknown         |
| GTGCCAAA                                                                                                             | mir-96/1271     |
| TGTAAATA                                                                                                             | Unknown         |
| AAGCACAA                                                                                                             | mir-218         |
| CTATGCAA                                                                                                             | mir-153         |
| GAGGTAGG                                                                                                             | Unknown         |
| TCGCGCCG                                                                                                             | Unknown         |
| AGCAATAA                                                                                                             | mir-137         |

A list of the top 18 highest scoring motifs listed by descending score. miRNA seeds account for 4 of the top 5 and 10 of the top 18 motifs.
